# Supplementary material
Source: PubMed Central journal article supplement (PMC7904614)
Supplement: NIHMS1644917-supplement-1.pdf [file NIHMS1644917-supplement-1.pdf]

## **Supplementary Information**

### **Laboratory Evolution of a Sortase Enzyme that Modifies the Alzheimer's Disease-Associated Amyloid $\beta$ -protein**

Christopher J. Podracky<sup>1,2</sup>, Chihui An<sup>2</sup>, Alexandra DeSousa<sup>3</sup>, Brent M. Dorr<sup>2</sup>, Dominic M. Walsh<sup>3</sup>, David R. Liu<sup>1,2,4</sup>

<sup>1</sup>Merkin Institute of Transformative Technologies in Healthcare, Broad Institute of Harvard and MIT, Cambridge, MA, 02142

<sup>2</sup>Department of Chemistry and Chemical Biology, Harvard University, Cambridge, MA, 021383

<sup>3</sup>Laboratory for Neurodegenerative Research, Ann Romney Center for Neurologic Diseases, Brigham and Women's Hospital and Harvard Medical School, Boston, MA, 02115

<sup>4</sup>Howard Hughes Medical Institute, Harvard University, Cambridge, MA, 02138

#### **Supplementary Tables**

1. Evolutionary history of SrtA $\beta$
2. Comparison of developed ELISA to commercial kits
3. Primers used to generate reversion mutants
4. Sex and age of cerebrospinal fluid donors

#### **Supplementary Figures**

1. TEV treatment reduces SrtA display to uninduced levels
2. Evolved sortase activity on fetuin A
3. Mutational analysis of the round 7 consensus sequence
4. Calcium dependence of evolved SrtA $\beta$
5. HPLC traces of semi-syntheses and other reaction mixtures

| Round | Library Size      | # Sorts | Positive Substrate                                                     | Conc. (nM)                               | Negative Substrate                                | Conc. ( $\mu$ M)                                  | Time (min)          | Buffer |
|-------|-------------------|---------|------------------------------------------------------------------------|------------------------------------------|---------------------------------------------------|---------------------------------------------------|---------------------|--------|
| 1     | $4.8 \times 10^7$ | 5       | Btn-GLPVGGV                                                            | 3200 $\rightarrow$ 100                   | <b>GLPESGT</b>                                    | 0 $\rightarrow$ 10                                | 60                  | TBS-BC |
| 2     | $7.2 \times 10^7$ | 5       | Btn-GLMVGGV                                                            | 10000 $\rightarrow$ 1000                 | <b>LMVTGV</b><br><b>LPVGGV</b>                    | 0 $\rightarrow$ 100<br>0 $\rightarrow$ 100        | 60                  | TBS-BC |
| 3     | $3.5 \times 10^7$ | 4       | Btn-GLMVGGV                                                            | 1000 $\rightarrow$ 320                   | <b>LMVTGV</b><br><b>LPVGGV</b>                    | 1 $\rightarrow$ 20<br>1 $\rightarrow$ 20          | 60                  | TBS-BC |
| 4     | $1.4 \times 10^7$ | 4       | Btn-GLMVGGV                                                            | 500 $\rightarrow$ 200                    | <b>LMVTGV</b><br><b>LPVGGV</b>                    | 20 $\rightarrow$ 100<br>20 $\rightarrow$ 100      | 60                  | TBS-BC |
| 5     | $4.2 \times 10^7$ | 4       | Btn-GLMVGGV                                                            | 500 $\rightarrow$ 50                     | <b>LMVTGV</b><br><b>LPVGGV</b>                    | 100<br>100                                        | 60                  | TBS-BC |
| 6     | $4 \times 10^7$   | 2       | Btn-GLMVGGV                                                            | 100                                      | <b>LMVTGV</b><br><b>LPVGGV</b>                    | 100<br>100                                        | 60                  | TBS-BC |
| 7     | $2.5 \times 10^7$ | 2       | Btn-GLMVGGV                                                            | 100 $\rightarrow$ 50                     | <b>LMVTGV</b><br><b>LPVGGV</b>                    | 100<br>100                                        | 60                  | TBS-BC |
| 8     | $1 \times 10^7$   | 5       | Btn-GLMVGGV                                                            | 500 $\rightarrow$ 50                     | <b>LMVTGV</b><br><b>LPVGGV</b>                    | 100<br>100                                        | 60                  | TBS-BC |
| 9     | $7 \times 10^7$   | 6       | Btn-GLMVGGV                                                            | 50                                       | <b>ALAVGGS</b><br><b>ALPPAGS</b><br><b>LPVGGV</b> | 10 $\rightarrow$ 50<br>10 $\rightarrow$ 50<br>100 | 60 $\rightarrow$ 30 | TBS-BC |
| 10    | $2 \times 10^7$   | 5       | Btn-GLMVGGV                                                            | 5000 $\rightarrow$ 500                   | -                                                 | -                                                 | 60                  | PC     |
| 11    | $8 \times 10^6$   | 5       | Btn-GLMVGGV                                                            | 500 $\rightarrow$ 50                     | -                                                 | -                                                 | 60                  | PC     |
| 12    | $2 \times 10^7$   | 5       | Btn-GLMVGGV                                                            | 50                                       | -                                                 | -                                                 | 60 $\rightarrow$ 20 | PC     |
| 13    | $5 \times 10^7$   | 6       | Btn-GLMVGGV                                                            | 50 $\rightarrow$ 30                      | -                                                 | -                                                 | 20                  | PC     |
| 14    | $4.4 \times 10^7$ | 6       | Btn-GLMVGGV                                                            | 30                                       | -                                                 | -                                                 | 20                  | PC     |
| 15    | $1 \times 10^7$   | 5       | Btn- <b>A<math>\beta</math>40</b>                                      | 200 $\rightarrow$ 20                     | -                                                 | -                                                 | 60 $\rightarrow$ 15 | PC     |
| 16    | $1.2 \times 10^7$ | 6       | Btn- <b>A<math>\beta</math>40</b><br>Btn- <b>A<math>\beta</math>42</b> | 10 $\rightarrow$ 5<br>10 $\rightarrow$ 5 | -                                                 | -                                                 | 15                  | PC     |

**Supplementary Table 1. Evolutionary history of SrtA $\beta$ .** Library size at the beginning of each round, number of sorts before re-diversification, and information on screening stringency are provided. Changes in substrate concentrations and reaction times over the course of a round are indicated where applicable. The sequences in each substrate relevant to sortase recognition are in bold. Changes in incubation time over the course of a round is indicated by an arrow where applicable. TBS-BC = 100 mM Tris pH 7.5, 500 mM NaCl, 1% BSA, 5 mM CaCl<sub>2</sub>. PC = human plasma, 5 mM CaCl<sub>2</sub>.

| Source               | Alloform(s) detected | Standard range (pg/mL) | LLoQ (pg/mL) | LLoD (pg/mL) | MDD + 3 (pg/mL) | MDD + 2 (pg/mL) |
|----------------------|----------------------|------------------------|--------------|--------------|-----------------|-----------------|
| This Work            | 40 and longer        | 39-2500                | 39-78        | 39           | 7.2             | 5.5             |
| LifeSpan BioSciences | 40                   | 12.4-1000              | -            | -            | <4.6            | -               |
| LifeSpan BioSciences | 42                   | 15.6-1000              | -            | -            | <9.4            | -               |
| RayBiotech           | 40                   | 100-100000             | -            | -            | -               | 100             |
| Biomatik             | 40                   | 12.4-1000              | -            | -            | -               | 4.6             |
| Biomatik             | 42                   | 12.4-1000              | -            | -            | -               | 5               |
| R&D Systems          | 40                   | 15.6-1000              | -            | -            | -               | 4               |
| R&D Systems          | 42                   | 7.8-500                | -            | -            | -               | 2.3             |
| Biorbyt              | 40                   | 125-8000               | -            | -            | 31.2            | -               |
| Biorbyt              | 42                   | 312-20000              | -            | -            | 78              | -               |
| IBL International    | 40                   | 188-1880               | -            | -            | 104             | -               |
| IBL International    | 42                   | 7.8-125                | 28.6         | 16           | -               | -               |
| Abexa                | 40                   | 15.6-1000              | -            | -            | 9.4             | -               |
| Abexa                | 42                   | 15.6-1000              | -            | -            | 9.4             | -               |
| Thermo               | 40                   | 7.8-500                | -            | -            | -               | <6              |
| Thermo               | 42                   | 15.6-1000              | -            | -            | -               | <10             |
| Novus                | 40                   | 15.6-1000              | -            | -            | 9.4             | -               |
| Novus                | 42                   | 15.6-1000              | -            | -            | 9.4             | -               |

**Supplementary Table 2. Comparison of developed ELISA to commercial kits.** Searching publicly available databases and manufacturer's catalogs for ELISA kits that detect human A $\beta$  reveals kits designed to be used with standards ranging in concentration from 7.8 to 100,000 pg/mL, with most individual kits ranging from ~10 to 1000 pg/mL. Most commercially available kits are designed for the detection of a single A $\beta$  alloform, normally A $\beta$ 40 or A $\beta$ 42. In contrast, SrtA $\beta$  has been shown to modify A $\beta$ 40, A $\beta$ 42, and A $\beta$ 43. The performance of these kits can be measured in multiple ways. The lower limit of quantitation (LLoQ) is defined as the lowest standard concentration with a signal higher than the average signal of the blank samples plus nine standard deviations that allows a percent recovery of 80-120%. The lower limit of detection (LLoD) is defined as the lowest standard concentration with a signal higher than the average signal of the blank samples plus nine standard deviations. The minimum detectable dose (MDD), referred to as sensitivity by some manufacturers, is the lowest concentration of analyte that can be differentiated from zero. It is obtained by taking the average of the blanks, adding 2 (MDD + 2) or 3 (MDD + 3) standard deviations, and using that value to calculate a concentration. In six ELISA experiments on six separate days, we observed LLoQ = 39 pg/mL on five occasions and LLoQ = 78 pg/mL once. We observed LLoD = 39 pg/mL on all six occasions. The average MDD across assays was 5.5 or 7.2 pg/mL, depending on whether 2 or 3 standard deviations were added to the average of the blanks.

| Mutant | Forward Primer                                   | Reverse Primer                                             |
|--------|--------------------------------------------------|------------------------------------------------------------|
| L76I   | GGCGGGCTATATTGAAATTCC                            | ACTTTGCTTTTATCTTTCCGG                                      |
| C102S  | ACCGTGGCG/ideoxyU/GTCCTTTGTG                     | ACGCCACGG/ideoxyU/CGAGCTGTTC                               |
| D105E  | AAGACGAAAGCC/ideoxyU/GGATGATCA<br>G              | AGGCTTTCTGTCT/ideoxyU/CTTCCACAAAGCACACG<br>CC              |
| D107N  | GAAAGCCTGGATGA/ideoxyU/CAGAAC                    | ATCATCCAGGCTT/ideoxyU/CGTTTTCTGCCACAAAG<br>CAC             |
| I118S  | GTCATACCGCGCT/ideoxyU/CTTCGTC                    | AAGCGCGGTA/ideoxyU/GACCGGAAATGCTAATGTT<br>CTGATCATCCAGG    |
| L123I  | ACTATCAGTT/ideoxyU/ACCAACCTGAG                   | GTAAACTGATAG/ideoxyU/GCGGACGAAGAATCGCG<br>GTATGACCG        |
| L124D  | TACCGCGCTTGACCGTCCGCACT                          | TGACCGATAATGCTAATGTTCTG                                    |
| H127N  | AACTATCAGTT/ideoxyU/ACCAACCTGAG<br>G             | AAACTGATAGT/ideoxyU/CGGACGAAGAAGCGCG                       |
| R134G  | CGAAACTAGACAGCA/ideoxyU/CGTGT                    | GATGCTGTCTAGTT/ideoxyU/CGCCGCCCCCAGGTT<br>GGTAAACTGATAGTGC |
| L138K  | GGCGGCGAAAAAAGACAGCATCG                          | CTCAGGTTGGTAAACTGATAG                                      |
| D139G  | AGCATCGTGTATTT/ideoxyU/ACAGTG                    | GTAAAATACACGATGC/ideoxyU/GCCTAGTTTCGCC<br>GCCC             |
| I141M  | ACTAGACAGCATGGTGTATTTTACAGTG<br>GG               | TTGCGCCGCCCTCAGGTTG                                        |
| T145K  | ATCGTGTATTTTAAAG/ideoxyU/GGGCAA<br>CGAAACCC      | ACTTTAAATACACGA/ideoxyU/GCTGTCTAGTTTCG                     |
| R152K  | CGAAACCCGTAAGTATAAAATAACCAGC                     | TTGCCCACTGTAAAATAC                                         |
| I155M  | CCAGCATTTGTAACG/ideoxyU/GAGAC                    | ACGTTACAAATGC/ideoxyU/GGTCATTTTATATCTAC<br>GGGTTTC         |
| C159R  | AGCATTCGTAACG/ideoxyU/GAGACCGA<br>CCG            | ACGTTACGAATGC/ideoxyU/GGTTATTTTATATCTAC<br>GGG             |
| R162K  | ACCGCGGTGGAAG/ideoxyU/GCTGGAT<br>G               | CACTTCCACCGCGG/ideoxyU/CGGTTTCACGTTACA<br>AATGCTG          |
| H172Q  | AGGAAGGCAAAGA/ideoxyU/AGACAGCT<br>GAC            | ATCTTTGCCTTCC/ideoxyU/GTTCATCCAGCACTTCC<br>AC              |
| E173K  | ATAAAGGCAAAGA/ideoxyU/AGACAGCT<br>GAC            | ATCTTTGCCTTTA/ideoxyU/GTTCATCCAGCACTTCC<br>AC              |
| R177K  | AGGCAAAGATAAACAGCTGACCC                          | TCATGTTTCATCCAGCACTTCC                                     |
| A182V  | ACCTGCGATGAT/ideoxyU/ATAACTATG                   | AATCATCGCAGG/ideoxyU/GACCAGGGTCAGCTGTC<br>TATC             |
| Y189V  | AAACCGGCGTG/ideoxyU/GGGAATCCAG                   | ACACGCCGGTT/ideoxyU/CTACGTTATAATCATCGCA<br>GGTCCG          |
| S196T  | CGTGTGGGAAACTAGTAAAATTTTTG                       | CCGTTTTCATAGTTATAATC                                       |
| S197R  | GTGGGAATCCCGTAAAATTTTTGTGG                       | ACGCCGTTTTCATAGTTATAATC                                    |
| R206K  | ACCGAAGTGAAAGGA/ideoxyU/CCGAAC<br>AAAAGCTTATTTTC | ATCCTTTCACTTCGG/ideoxyU/CGCCAC                             |

**Supplementary Table 3. Primers used to generate reversion mutants.**

| <b>Sample</b> | <b>Sex</b> | <b>Age (years)</b> |
|---------------|------------|--------------------|
| 1             | F          | 78                 |
| 2             | M          | 61                 |
| 3             | M          | 64                 |
| 4             | F          | 86                 |
| 5             | M          | 73                 |
| 6             | M          | 64                 |
| 7             | M          | 67                 |
| 8             | M          | 67                 |
| 9             | M          | 72                 |
| 10            | F          | 78                 |

**Supplementary Table 4. Sex and age of cerebrospinal fluid donors.**

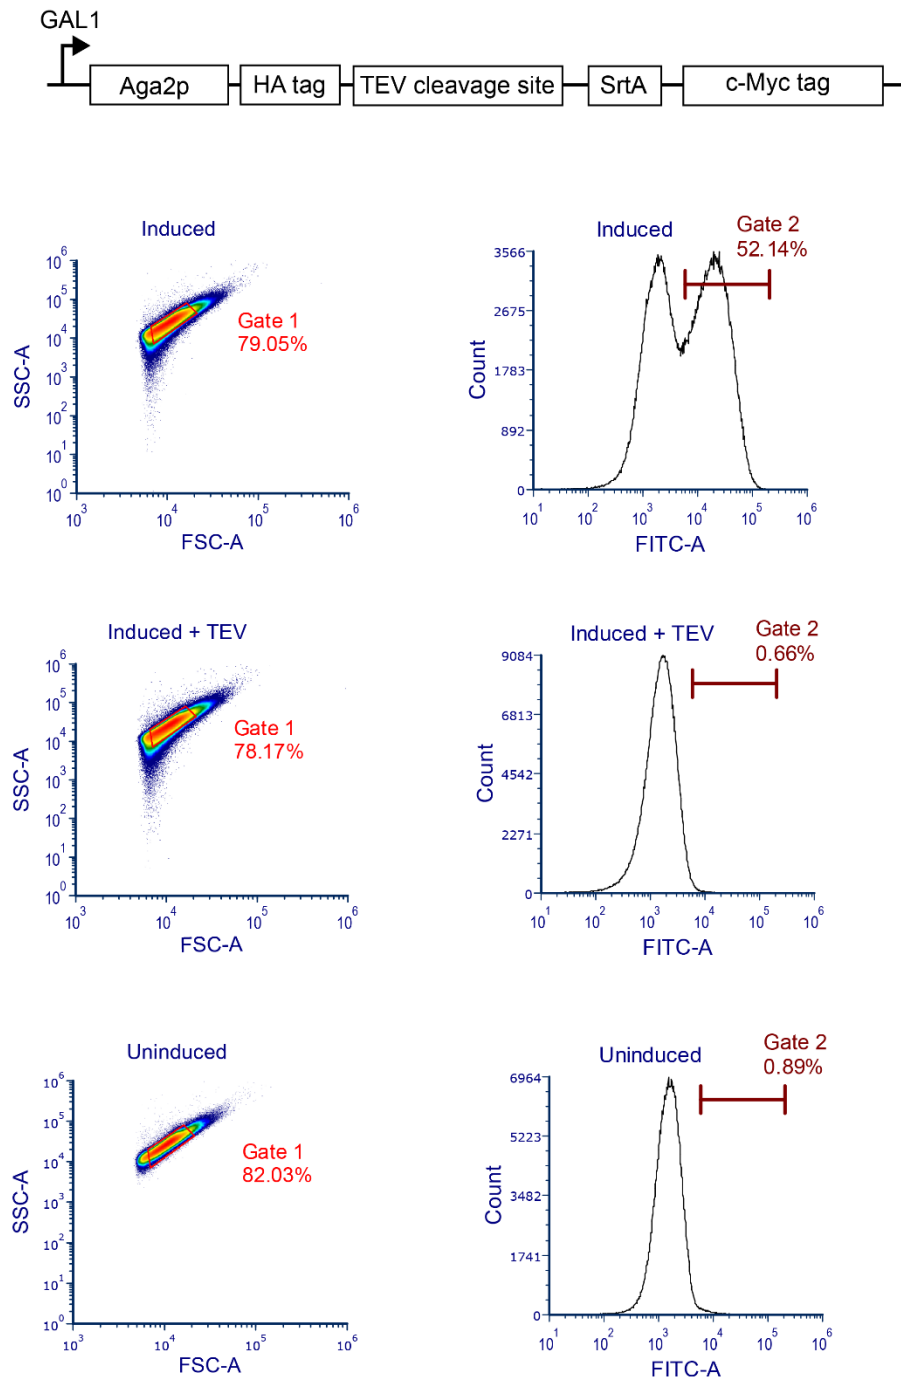

**Supplementary Figure 1. TEV treatment reduces SrtA display to uninduced levels.** TEV cleavage to remove SrtA also removes its C-terminal c-Myc tag. Staining of an induced population of cells, cells from that same population that have been treated with TEV as described above, and uninduced cells for c-Myc tag (chicken anti-c-myc, Invitrogen A-21281, followed by goat anti-chicken IgY AlexaFluor 488 conjugate, Invitrogen A-11039) shows that TEV treatment reduces the amount of apparent c-Myc to uninduced levels.

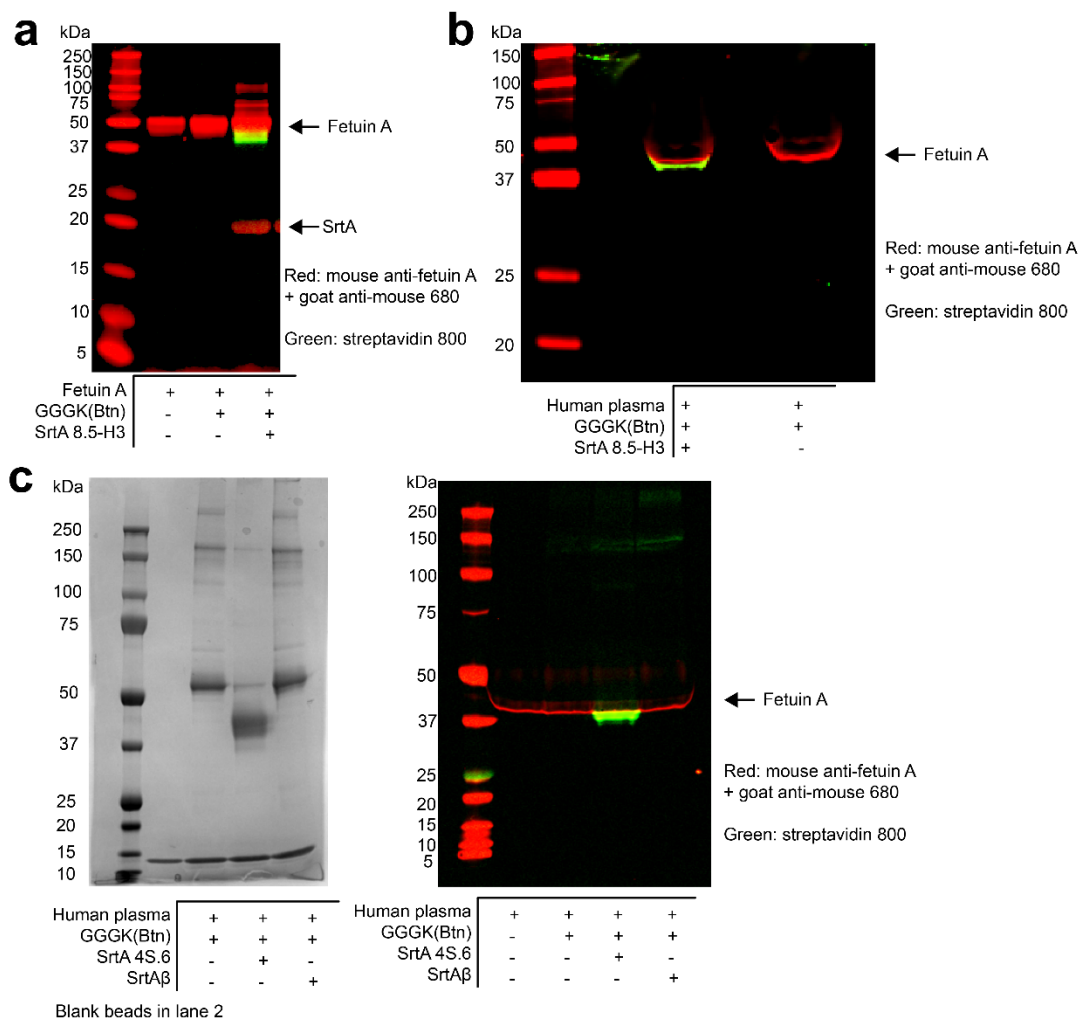

**Supplementary Figure 2. Evolved sortase activity on fetuin A.** (a) Fetuin A (5  $\mu$ M) was incubated with SrtA 8.5-H3 (20  $\mu$ M) and GGGK(Btn) (100  $\mu$ M). Labeled fetuin A is detected by Western blot. The laddering in lane 4 is only observed in the presence of both SrtA and fetuin. (b) Western blot of overnight reaction of SrtA 8.5-H3 (50  $\mu$ M) and GGGK(Btn) (1 mM) in human plasma shows labeling of endogenous fetuin A (c) In a two hour reaction of SrtA $\beta$  (1  $\mu$ M) and GGGK(Btn) (1 mM) in human plasma, no enzyme dependent modifications are observed upon streptavidin pull-down and Coomassie staining. The bands observed in the +SrtA $\beta$  +GGGK(Btn) lane are also observed in the GGGK(Btn) only lane. Notably, treatment with sortase 4S.6 under the same conditions leads to pull-down of a protein not observed in the other lanes. (d) Western blot of these reactions prior to pull-down shows that 4S.6, but not SrtA $\beta$ , labels fetuin A. This is notable evidence of a change in substrate specificity between 4S.6 and SrtA $\beta$ . Labeling of purified fetuin A, plasma Western blot, and plasma pull-down were each performed three times with similar results.

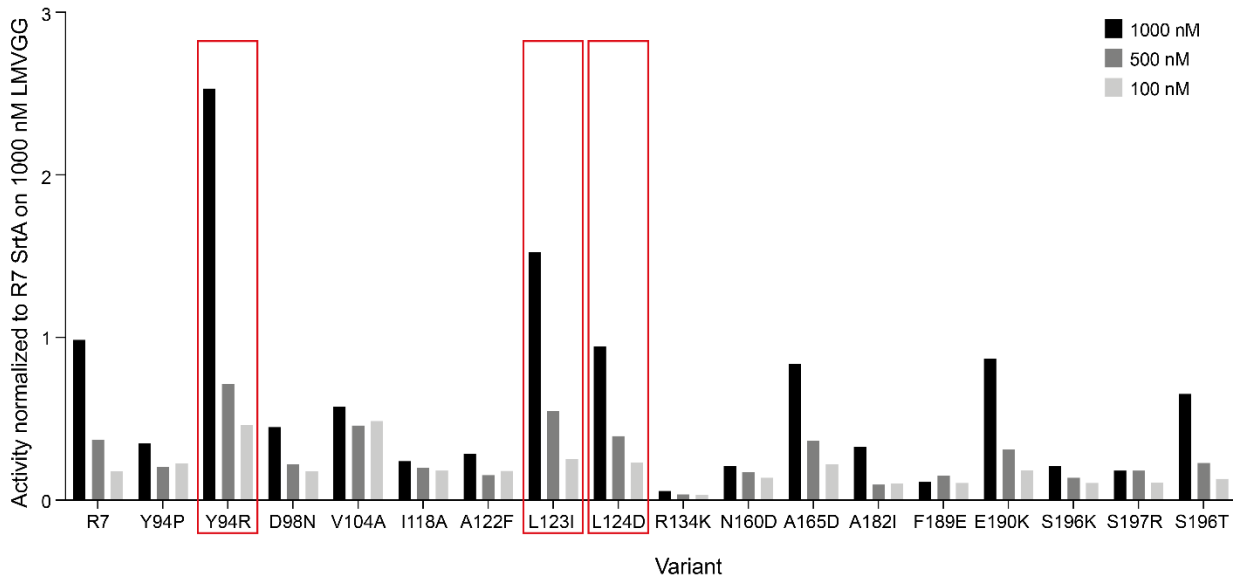

**Supplementary Figure 3. Mutational analysis of the round 7 consensus sequence.**

Single mutant reversions from the round 7 consensus sequence (R7) were made back to 4S.6 and wild-type SrtA. After induction and preparation for cell surface sortase reactions, clonal populations were incubated for 1 hour with 100-1000 nM Btn-LMVGG. Reversion mutant Y94R showed a 2.3-fold improvement on average across substrate concentrations compared to the round 7 consensus sequence. L123I (1.5-fold) and L124D (1.1-fold) also showed improvement. These three residues and residue 122 (by virtue of its proximity to 123 and 124) were targeted for site-saturation mutagenesis heading into round 9. Activity is defined as fold-increase in PE signal over a negative control (0 nM Btn-LMVGG) aliquot of each variant.



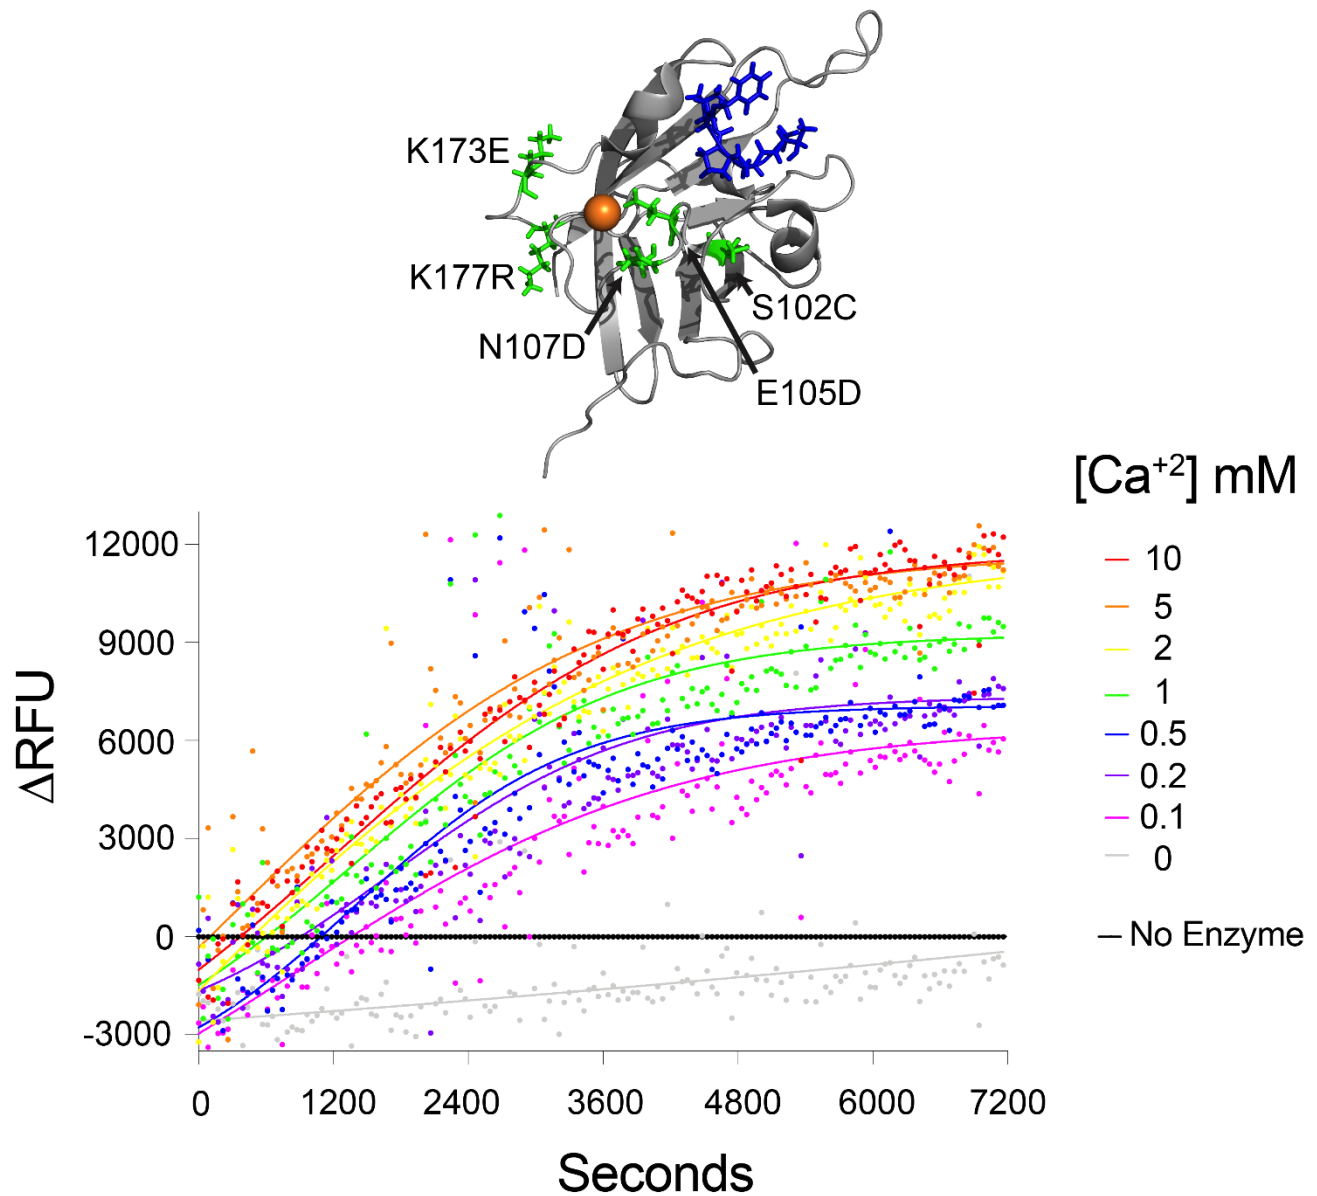

**Supplementary Figure 4. Calcium dependence of evolved SrtA $\beta$ .** Several mutations (green) in SrtA $\beta$  map near the calcium (orange) binding site. To assess the impact of these mutations on sortase calcium dependence, we treated 20  $\mu$ M Abz-LMVGG(Dnp)-CONH<sub>2</sub> with SrtA $\beta$  in the presence of varying concentrations of calcium. Samples containing calcium showed an increase in fluorescence over time, while samples lacking calcium failed to rise above the level of a negative control lacking enzyme. Notably, SrtA $\beta$  shows activity at physiologically relevant calcium concentrations (typical ionized calcium levels in plasma range from 1.3-1.5 mM).

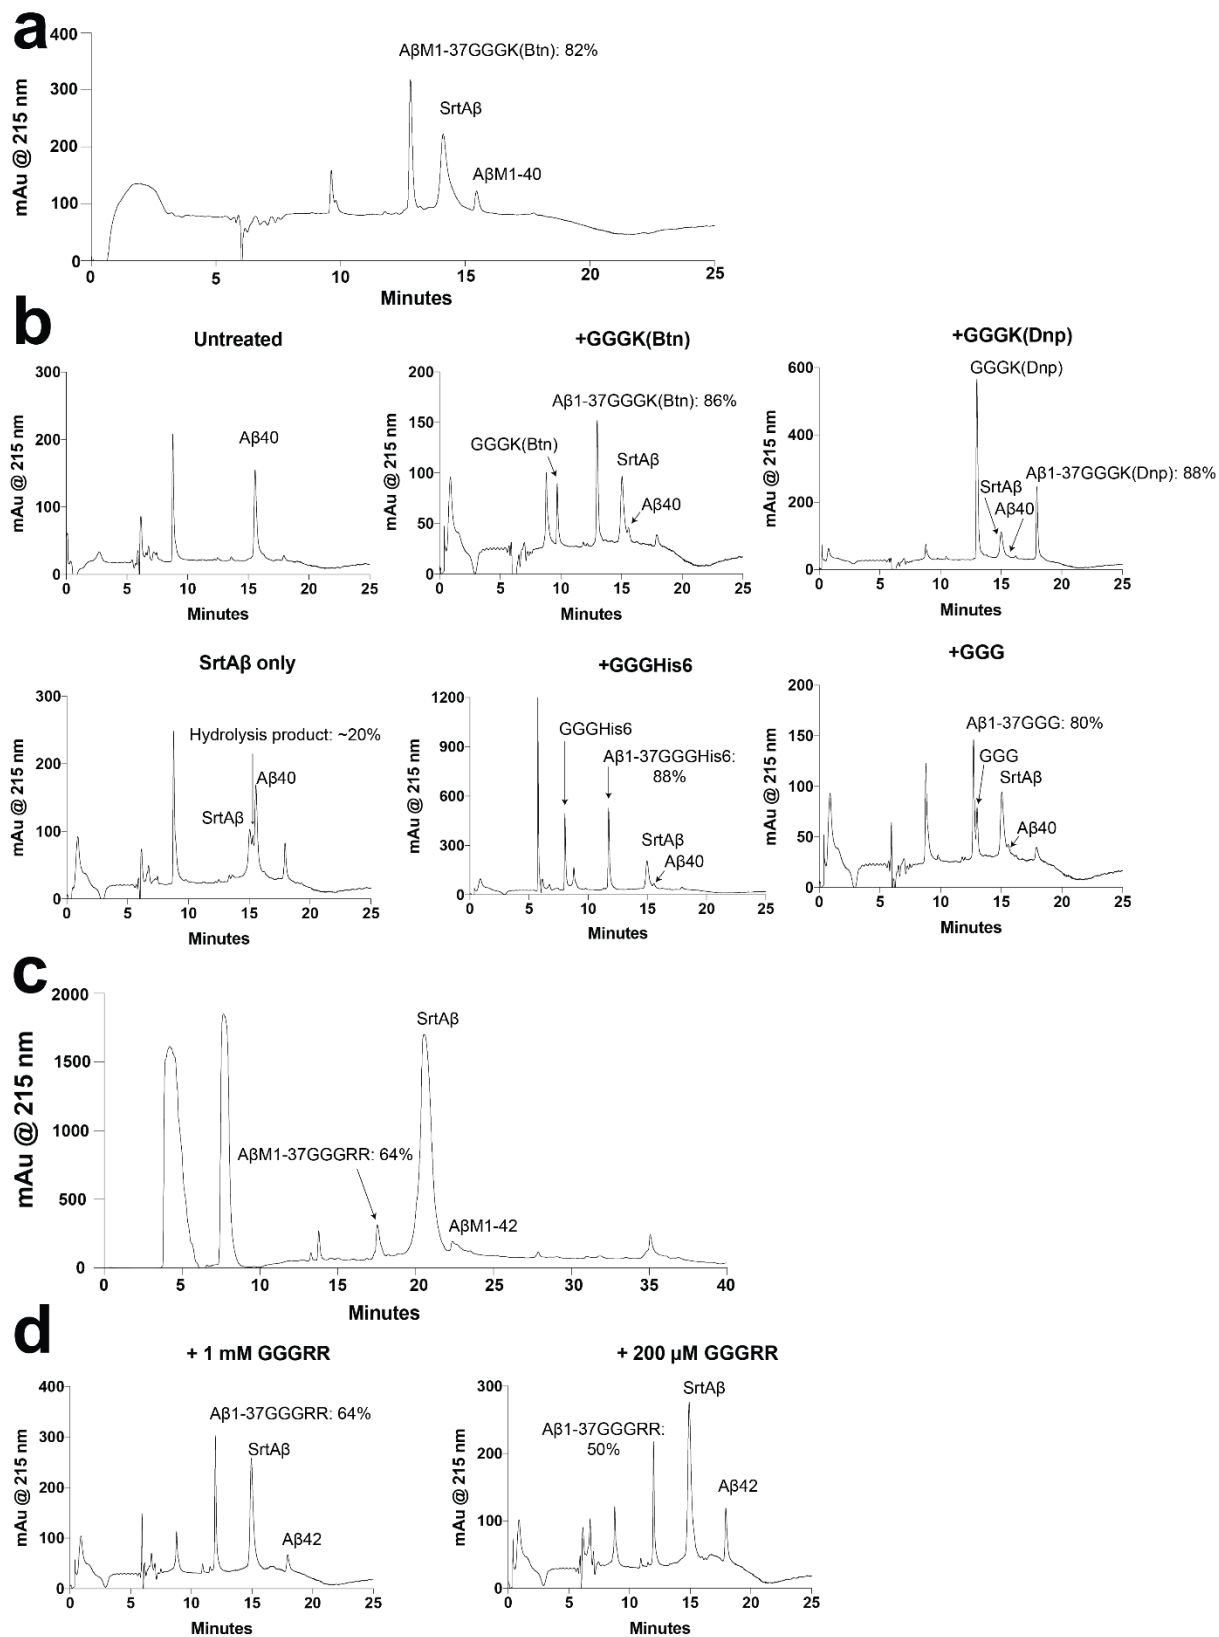

**Supplementary Figure 5. HPLC traces of semi-syntheses and other reaction mixtures.**  
 (a) In a representative injection from the A $\beta\text{M1-37GGGK(Btn)}$  semi-synthesis described

above, 82% of the starting A $\beta$ M1-40 was converted to the desired product, with no clear evidence of hydrolysis or alternate transpeptidation products. **(b)** 120  $\mu$ M chemically synthesized A $\beta$ 40 (0.25 mg scale) was reacted overnight with 40  $\mu$ M SrtA $\beta$  and 1 mM of the indicated glycine-based nucleophile before lyophilization, dissolution in 7 M guanidinium chloride, 50 mM Tris pH 7.5, 2 mM EDTA, and analysis of the crude reaction mixture by HPLC. In the presence of SrtA $\beta$  but the absence of glycine nucleophiles, we observed a peak that does not fully resolve from the enzyme or A $\beta$ 40. This putative hydrolysis product has an area roughly one-quarter that of the A $\beta$ 40 peak. In the presence of glycine nucleophiles this product is never observed. Instead, we observe the expected transpeptidation products in yields of 80-88%. **(c)** In a representative injection from the A $\beta$ M1-37GGRR semi-synthesis described above, 64% of the starting A $\beta$ M1-42 was converted to the desired product, with no clear evidence of hydrolysis or alternate transpeptidation products. **(d)** 120  $\mu$ M chemically synthesized A $\beta$ 42 (0.4 mg scale) was reacted overnight with 30  $\mu$ M SrtA $\beta$  and 1 mM or 200  $\mu$ M GGRR before lyophilization, dissolution in 7 M guanidinium chloride, 50 mM Tris pH 7.5, 2 mM EDTA, and analysis of the crude reaction mixture by HPLC using the column and protocol from the A $\beta$ M1-37GGGK(Btn) semi-synthesis. 64% of the A $\beta$ 42 was converted to the expected product when reacted with 1 mM GGRR as opposed to 50% when reacted with 200  $\mu$ M GGRR.
